# Supplementary material for: Early-onset mild cognitive impairment in Parkinson’s disease: Altered corticopetal cholinergic network
Source: PubMed Central journal article supplement (PMC5443757; doi:10.1038/s41598-017-02420-w), 2017-05-24

## Title

Early-onset mild cognitive impairment in Parkinson's disease: Altered corticopetal cholinergic network

Injoong Kim, M.D.<sup>1</sup>, Na-Young Shin, M.D.<sup>2\*</sup>, Yunjin Bak, M.A.<sup>2</sup>, Phil Hyu Lee, M.D.<sup>3</sup>,  
Seung-Koo Lee, M.D.<sup>4</sup>, Soo Mee Lim, M.D.<sup>5</sup>

<sup>1</sup>Department of Radiology, Veterans Health Service Medical Center, Seoul, 05368, Korea

<sup>2</sup>Department of Radiology, College of Medicine, The Catholic University of Korea, Seoul, 06591, Korea

<sup>3</sup>Department of Neurology, Yonsei University College of Medicine, Seoul, 03722, Korea

<sup>4</sup>Department of Radiology, Yonsei University College of Medicine, Seoul, 03722, Korea

<sup>5</sup>Department of Radiology, Ewha Womans University School of Medicine, Seoul, 07985, Korea

\*Corresponding author: Na-Young Shin, M.D. PhD.

Department of Radiology, College of Medicine, The Catholic University of Korea, Seoul, Korea

222 Banpo-daero, Seocho-gu,

Seoul 06591, Korea

TEL: 82-2-2558-1443

E-mail: [nyshin@catholic.ac.kr](mailto:nyshin@catholic.ac.kr)

Supplementary Table 1. Group comparisons of rsFC between the bilateral SI and major brain regions in all group contrasts.

| Contrast              | Region                        | Side | MNI Coordinates |     |     | Maximum <i>t</i> | No. of voxels | <i>P</i> value |
|-----------------------|-------------------------------|------|-----------------|-----|-----|------------------|---------------|----------------|
|                       |                               |      | x               | y   | z   |                  |               |                |
| PD-MCI < PD-IC        | Angular gyrus                 | R    | 45              | -57 | 54  | 4.22             | 101           | < 0.001        |
|                       | Superior parietal gyrus       | L    | -18             | -75 | 57  | 3.67             | 59            | < 0.001        |
| PD-MCI > PD-IC        | Inferior orbitofrontal gyrus  | R    | 42              | 39  | -12 | 3.9              | 40            | < 0.001        |
| PD-MCI-SD < PD-IC     | Superior frontal gyrus        | R    | 24              | 54  | 6   | 5.37             | 81            | < 0.001        |
|                       | Middle frontal gyrus          | R    | 30              | 18  | 42  | 4.97             | 40            | < 0.001        |
|                       | Medial superior frontal gyrus | R    | 12              | 33  | 45  | 4.53             | 33            | < 0.001        |
|                       | Middle frontal gyrus          | L    | -39             | 48  | 6   | 4.22             | 41            | < 0.001        |
|                       | Inferior frontal triangularis | L    | -45             | 30  | 30  | 3.98             | 27            | < 0.001        |
|                       | Cerebellum                    | L    | -9              | -72 | -30 | 3.88             | 25            | < 0.001        |
|                       | Thalamus                      | L    | -6              | -9  | 3   | 3.81             | 33            | < 0.001        |
|                       | Superior orbitofrontal gyrus  | L    | -15             | 63  | -6  | 3.68             | 26            | < 0.001        |
|                       | Middle frontal gyrus          | L    | -36             | 15  | 57  | 3.55             | 25            | < 0.001        |
| PD-MCI-SD > PD-IC     | Middle occipital gyrus        | L    | -18             | -93 | 36  | 4.79             | 90            | < 0.001        |
|                       | Superior parietal gyrus       | R    | 27              | -63 | 60  | 4.38             | 141           | < 0.001        |
|                       | Precuneus                     | L    | -12             | -78 | 51  | 4.34             | 41            | < 0.001        |
|                       | Superior occipital gyrus      | R    | 18              | -87 | 33  | 4.15             | 84            | < 0.001        |
|                       | Inferior occipital gyrus      | R    | 33              | -93 | -3  | 4.06             | 40            | < 0.001        |
|                       | Middle temporal gyrus         | L    | -63             | -51 | 6   | 3.95             | 27            | < 0.001        |
|                       | Postcentral gyrus             | R    | 51              | -27 | 60  | 3.9              | 50            | < 0.001        |
| PD-MCI-LD < PD-IC     | Inferior temporal gyrus       | R    | 48              | 6   | -45 | 4.31             | 28            | < 0.001        |
|                       | Inferior orbitofrontal gyrus  | R    | 42              | 33  | -12 | 3.6              | 37            | < 0.001        |
| PD-MCI-SD < PD-MCI-LD | Precuneus                     | L    | -12             | -51 | 36  | 4.86             | 147           | < 0.001        |
|                       | Middle frontal gyrus          | L    | -33             | 15  | 54  | 4.81             | 55            | < 0.001        |
|                       | Angular gyrus                 | R    | 51              | -60 | 42  | 4.76             | 79            | < 0.001        |
|                       | Superior frontal gyrus        | R    | 24              | 66  | 6   | 3.98             | 41            | < 0.001        |
|                       | Superior frontal gyrus        | R    | 18              | 21  | 54  | 3.97             | 37            | < 0.001        |
|                       | Angular gyrus                 | L    | -45             | -60 | 39  | 3.95             | 32            | < 0.001        |
| PD-MCI-SD > PD-MCI-LD | Postcentral gyrus             | R    | 48              | -27 | 60  | 5.63             | 34            | < 0.001        |

Supplementary Figure

Supplementary Figure 1. Mean rsFC with the bilateral SI seed extracted from areas showing significant differences between the PD-MCI-SD and PD-IC groups.

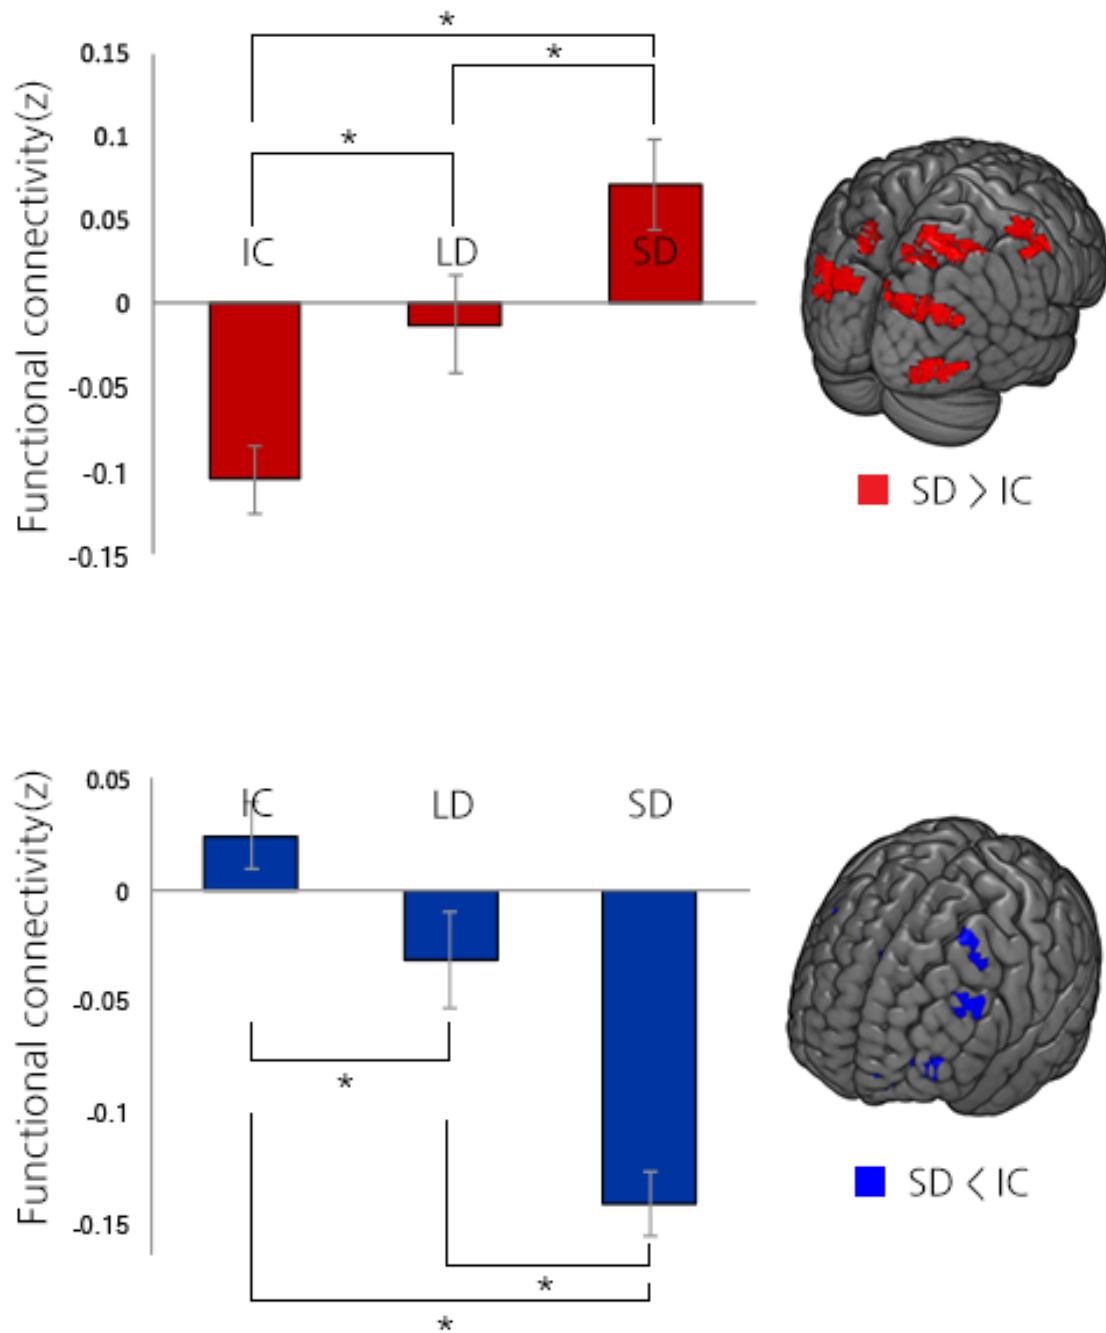

\*:  $P < 0.05$

Supplementary Figure 2. Mean rsFC with the bilateral SI seed extracted from areas showing significant differences between the PD-MCI-SD and PD-MCI-LD groups.

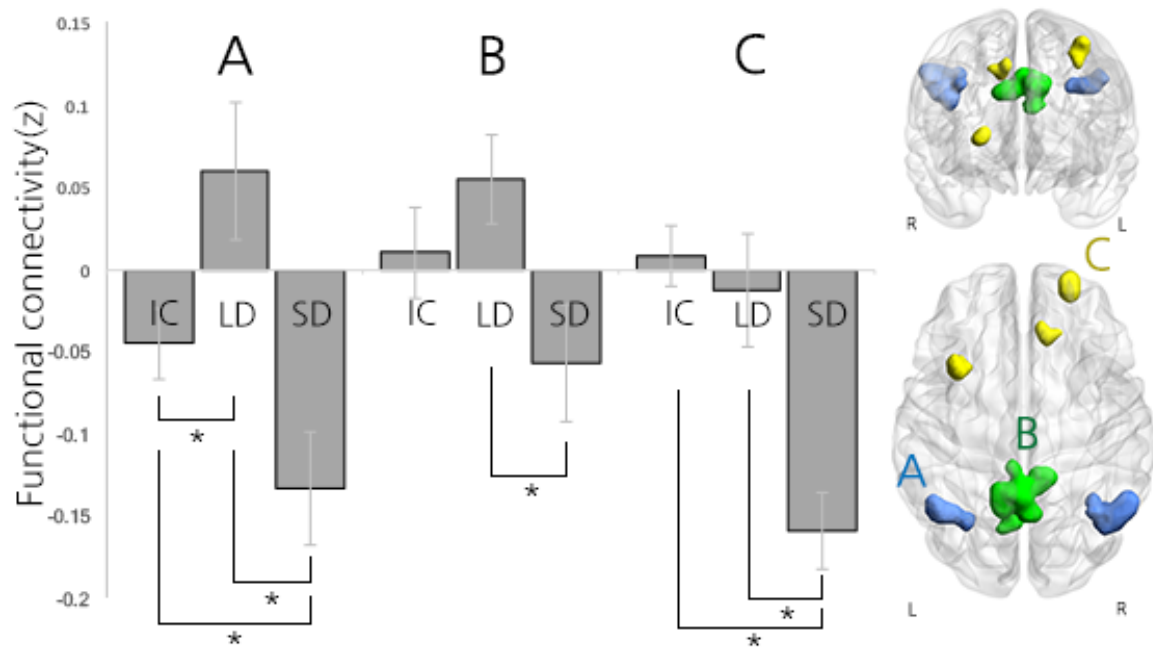

\*:  $P < 0.05$

Supplementary Figure 3. Bilateral SI seed. Coronal slice of the template image showing the location of the SI used in the seed-based rsFC analysis.

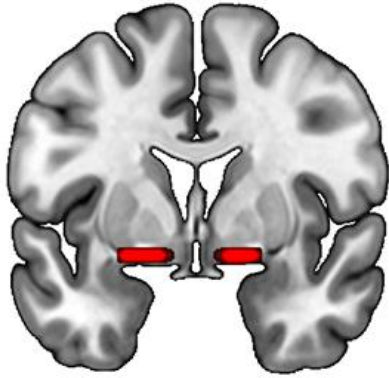

Supplement: 41598_2017_2420_MOESM1_ESM.pdf [file 41598_2017_2420_MOESM1_ESM.pdf]
